# Supplementary material
Source: publisher figshare collection journal article supplement (https://tandf.figshare.com/ndownloader/files/13525187)
Supplement: Supplementary file 1 [file 13525187]

Supplementary Table 1

MEA results for ADP, ASPI, COL, TRAP and Platelet (PLT) count

|  | Baseline [i] | CPB [ii] | postbypass [iii] | ICU [iv] |
| --- | --- | --- | --- | --- |
| ADP [U] | 77 [63-90] | 64 [43-85] | 35 [25-62] | 53 [38-79] |
| ASPI [U] | 64 [28-102] | 21 [13-37] | 14 [8-34] | 28 [17-58] |
| COL [U] | 73 [56-88] | 73 [55-94] | 64 [38-95] | 88 [67-108] |
| TRAP [U] | 134 [120-150] | 135 [110-155] | 108 [80-142] | 134 [106-162] |
| PLT count [x109/l] | 193 [162-222] | 126 [105-156] | 91 [73-112] | 113 [92-139] |

Data are presented as median [IQR]

Time points; baseline (i), during CPB (ii), after CPB decanulation and protamine (iii) and arrival at the ICU (iv).
